# Supplementary material for: Increased nitrogen enrichment and shifted patterns in the world’s grassland: 1860–2014
Source: Copernicus journal article supplement (doi:10.5194/essd-2018-94), 2018-09-18
Supplement: Supplementary file [file essd-2018-94-AC2-supplement.pdf]

## 1. Regional classifications

According to the Intergovernmental panel on Climate Change the fifth assessment (IPCC AR5) and Tian et al. (2016), we divided the world into seven regions including North America, South America, Africa, Europe, southern Asia, northern Asia, and Oceania. To be clarified, southern Asia was divided into five parts (i.e., West, South, East, Central and Southeast Asia) since sub-regions within it have become hotspots for nitrogen inputs and greenhouse gas emissions (e.g., South and East Asia) (Fig. S1, Table S1).

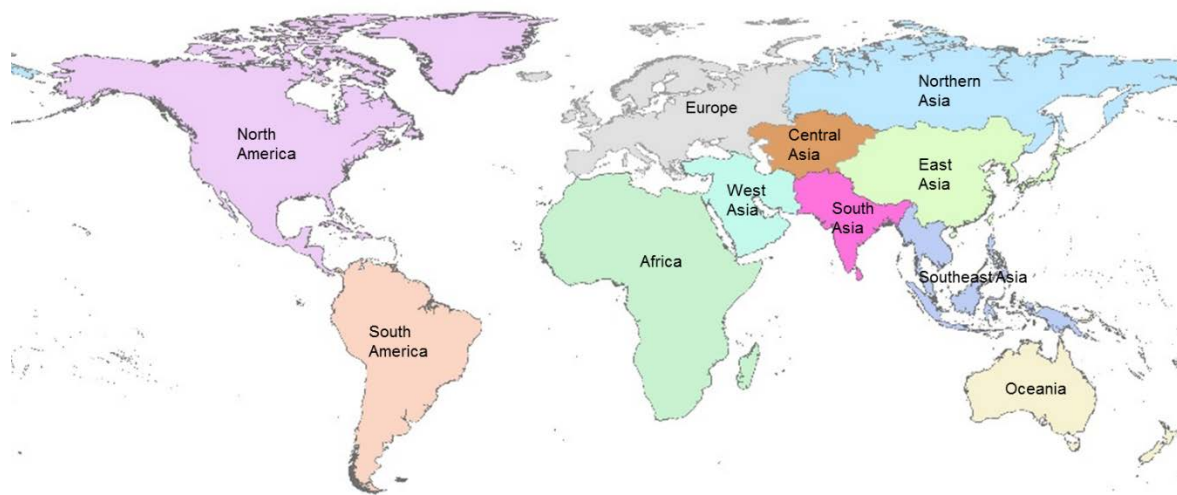

Figure S1. The classification of regions in the world.

Table S1 The countries included in eleven regions across the globe.

| Regions       | Countries                                                                                                                                                                                                                                                                                                                                                                                                                                                                                                                                                  |                                                                                                                                             |
|---------------|------------------------------------------------------------------------------------------------------------------------------------------------------------------------------------------------------------------------------------------------------------------------------------------------------------------------------------------------------------------------------------------------------------------------------------------------------------------------------------------------------------------------------------------------------------|---------------------------------------------------------------------------------------------------------------------------------------------|
| North America | Bahamas, Belize, Canada, Costa Rica, Cuba, Dominican Republic, El Salvador, Guadeloupe, Guatemala, Haiti, Honduras, Jamaica, Martinique, Mexico, Nicaragua, Panama, Puerto Rico, Saint Lucia, Saint Vincent and the Grenadines, the US, and Trinidad and Tobago                                                                                                                                                                                                                                                                                            |                                                                                                                                             |
| South America | Argentina, Bolivia, Brazil, Chile, Colombia, Ecuador, Guyana, French Guiana, Paraguay, Peru, Suriname, Uruguay and Venezuela                                                                                                                                                                                                                                                                                                                                                                                                                               |                                                                                                                                             |
| Europe        | Albania, Austria, Belarus, Belgium, Bosnia and Herzegovina, Bulgaria, Croatia, Czech Republic, Denmark, Estonia, Finland, France, Germany, Greece, Hungary, Ireland, Italy, Latvia, Lithuania, Luxembourg, Macedonia, Malta, Moldova, Montenegro, Netherlands, Norway, Poland, Portugal, Romania, Slovakia, Slovenia, Spain, Sweden, Ukraine and the UK                                                                                                                                                                                                    |                                                                                                                                             |
| Africa        | Algeria, Angola, Benin, Botswana, Burkina Faso, Burundi, Cabo Verde, Cameroon, Central African Republic, Chad, Democratic Republic of the Congo, Republic of the Congo, Cote d'Ivoire, Djibouti, Egypt, Equatorial Guinea, Eritrea, Eswatini, Ethiopia, Gabon, Ghana, Guinea, Guinea-Bissau, Kenya, Lesotho, Liberia, Libya, Madagascar, Malawi, Malvinas, Mali, Mauritania, Morocco, Mozambique, Namibia, Niger, Nigeria, Rwanda, Senegal, Sierra Leone, Somalia, South Africa, South Sudan, Sudan, Tanzania, Togo, Tunisia, Uganda, Zambia, and Zimbabwe |                                                                                                                                             |
| Oceania       | Australia and New Zealand                                                                                                                                                                                                                                                                                                                                                                                                                                                                                                                                  |                                                                                                                                             |
| northern Asia | Russian Federation                                                                                                                                                                                                                                                                                                                                                                                                                                                                                                                                         |                                                                                                                                             |
| southern Asia | Central Asia                                                                                                                                                                                                                                                                                                                                                                                                                                                                                                                                               | Kazakhstan, Kyrgyzstan, Tajikistan, Turkmenistan, and Uzbekistan                                                                            |
|               | East Asia                                                                                                                                                                                                                                                                                                                                                                                                                                                                                                                                                  | China, Japan, Mongolia, North Korea, and South Korea                                                                                        |
|               | South Asia                                                                                                                                                                                                                                                                                                                                                                                                                                                                                                                                                 | Afghanistan, Bangladesh, Bhutan, India, Nepal, Pakistan, and Sri Lanka                                                                      |
|               | Southeast Asia                                                                                                                                                                                                                                                                                                                                                                                                                                                                                                                                             | Cambodia, Indonesia, Laos, Malaysia, Myanmar, Papua New Guinea, Philippines, Thailand, Timor-Leste, Vietnam                                 |
|               | West Asia                                                                                                                                                                                                                                                                                                                                                                                                                                                                                                                                                  | Armenia, Azerbaijan, Georgia, Iran, Iraq, Israel, Jordan, Kuwait, Oman, Qatar, Saudi Arabia, Syria, Turkey, United Arab Emirates, and Yemen |

2. Global and regional grassland area changes over the period 1860-2016 (adapted from HYDE 3.2, Klein Goldewijk, 2017)

We aggregated 5-arc minute HYDE 3.2 land use dataset to 0.5 degree. Since HYDE 3.2 only provided every 10 years land use data during 1860-2000, we used the linear interpolation to produce annual maps for pastures and rangelands for each 0.5 grid cell. Grassland area increased from 1250 to 3295 Mha during 1860-2016, as shown in Fig.S2. The pasture area was increasing from 268 to 803 Mha during the study period (Fig.S2, Table S2). Compared with the area in the 1860s, Oceania and South America experienced a substantial expansion of pastureland, roughly 3136% and 2228%, respectively. North America, Africa, and southern Asia also exhibited a huge increase of pastureland, 760%, 381%, and 140%, respectively. In contrast, pastureland in Europe exhibited a slight decrease (13%). The rangeland area was increasing from 982 to 2492 Mha during 1860-2016 (Fig.S2, Table S3). Similar to the pastureland expansion, Oceania and South America experienced a substantial increase in rangeland area, 1656% and 521%, respectively, followed by North America (350%) and southern Asia (123%). In contrast, northern Asia exhibited a slight decrease, about 7%.

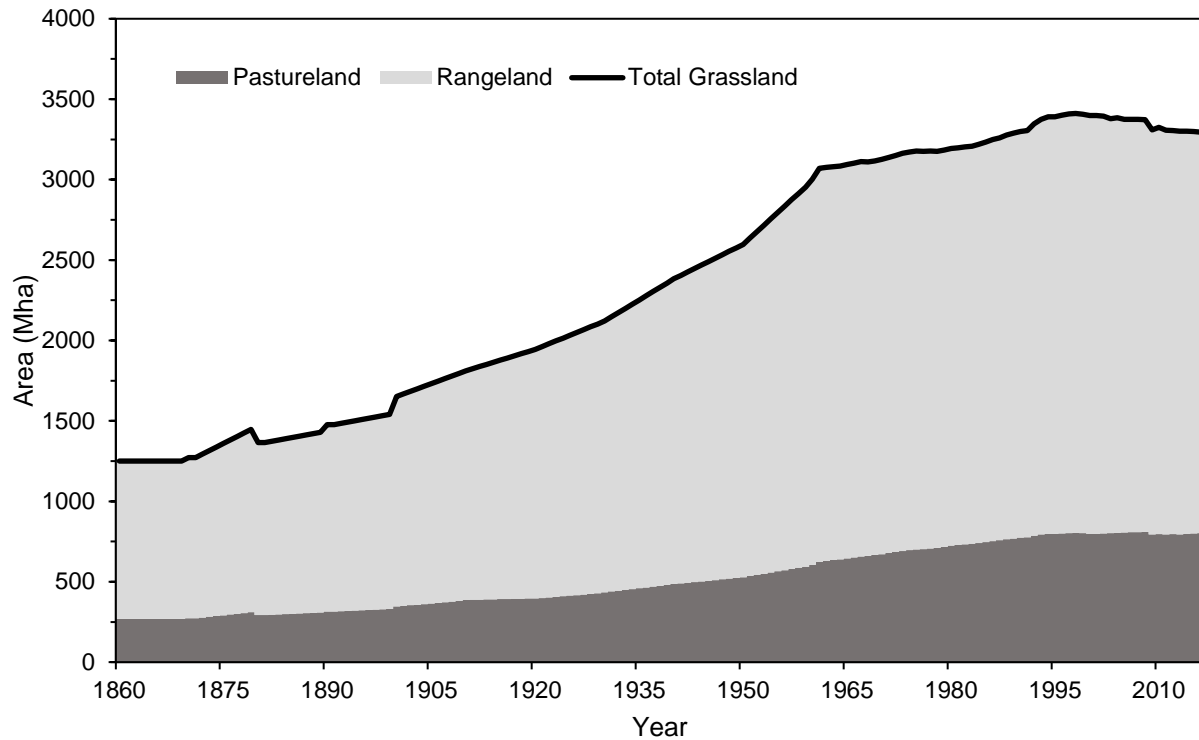

Figure S2. The temporal variations of global total grassland, pastureland, and rangeland areas during 1860-2016 (adapted from HYDE 3.2, Klein Goldewijk, 2017).

Table S2 Pasture area changes (Mha) during the period 1860-2016 (adapted from HYDE 3.2, Klein Goldewijk, 2017).

| Pasture (Mha) | North America | South America | Europe | Africa | Oceania | Southern Asia | Northern Asia | Total |
|---------------|---------------|---------------|--------|--------|---------|---------------|---------------|-------|
| 1860s         | 9.9           | 5.6           | 109.3  | 60.9   | 0.2     | 69.8          | 7.7           | 263.4 |
| 1880s         | 18.0          | 9.0           | 121.7  | 69.9   | 0.5     | 64.1          | 10.9          | 294.1 |
| 1900s         | 38.4          | 18.0          | 134.2  | 79.2   | 1.1     | 70.9          | 16.2          | 358.0 |
| 1920s         | 46.3          | 32.5          | 133.8  | 92.8   | 2.6     | 80.7          | 16.4          | 405.1 |
| 1940s         | 66.5          | 54.3          | 133.2  | 123.9  | 4.4     | 90.9          | 24.1          | 497.3 |
| 1960s         | 86.8          | 89.4          | 107.1  | 213.3  | 7.4     | 116.8         | 12.0          | 632.8 |
| 1980s         | 83.2          | 118.7         | 105.0  | 258.4  | 8.1     | 149.8         | 13.0          | 736.2 |
| 2000-2016     | 85.3          | 131.2         | 94.6   | 293.1  | 7.6     | 167.9         | 11.6          | 791.3 |

Table S3 Rangeland area changes (Mha) during the period 1860-2016(adapted from HYDE 3.2, Klein Goldewijk, 2017).

| Rangeland (Mha) | North America | South America | Europe | Africa | Oceania | Southern Asia | Northern Asia | Total   |
|-----------------|---------------|---------------|--------|--------|---------|---------------|---------------|---------|
| 1860s           | 61.0          | 54.1          | 31.8   | 372.0  | 20.1    | 404.2         | 33.1          | 976.3   |
| 1880s           | 89.4          | 69.7          | 36.0   | 402.9  | 45.6    | 406.9         | 37.8          | 1088.3  |
| 1900s           | 157.5         | 107.7         | 37.7   | 433.8  | 100.8   | 472.8         | 43.2          | 1353.5  |
| 1920s           | 174.3         | 158.1         | 38.7   | 466.8  | 178.1   | 545.4         | 43.7          | 1605.1  |
| 1940s           | 242.6         | 223.0         | 37.7   | 526.9  | 277.8   | 607.4         | 51.3          | 1966.7  |
| 1960s           | 287.9         | 291.4         | 31.6   | 674.2  | 389.7   | 734.1         | 23.2          | 24312.1 |
| 1980s           | 265.7         | 312.5         | 32.8   | 634.8  | 394.6   | 810.3         | 24.6          | 2475.3  |
| 2000-2016       | 274.8         | 335.7         | 36.4   | 598.0  | 353.4   | 903.3         | 30.8          | 2532.4  |

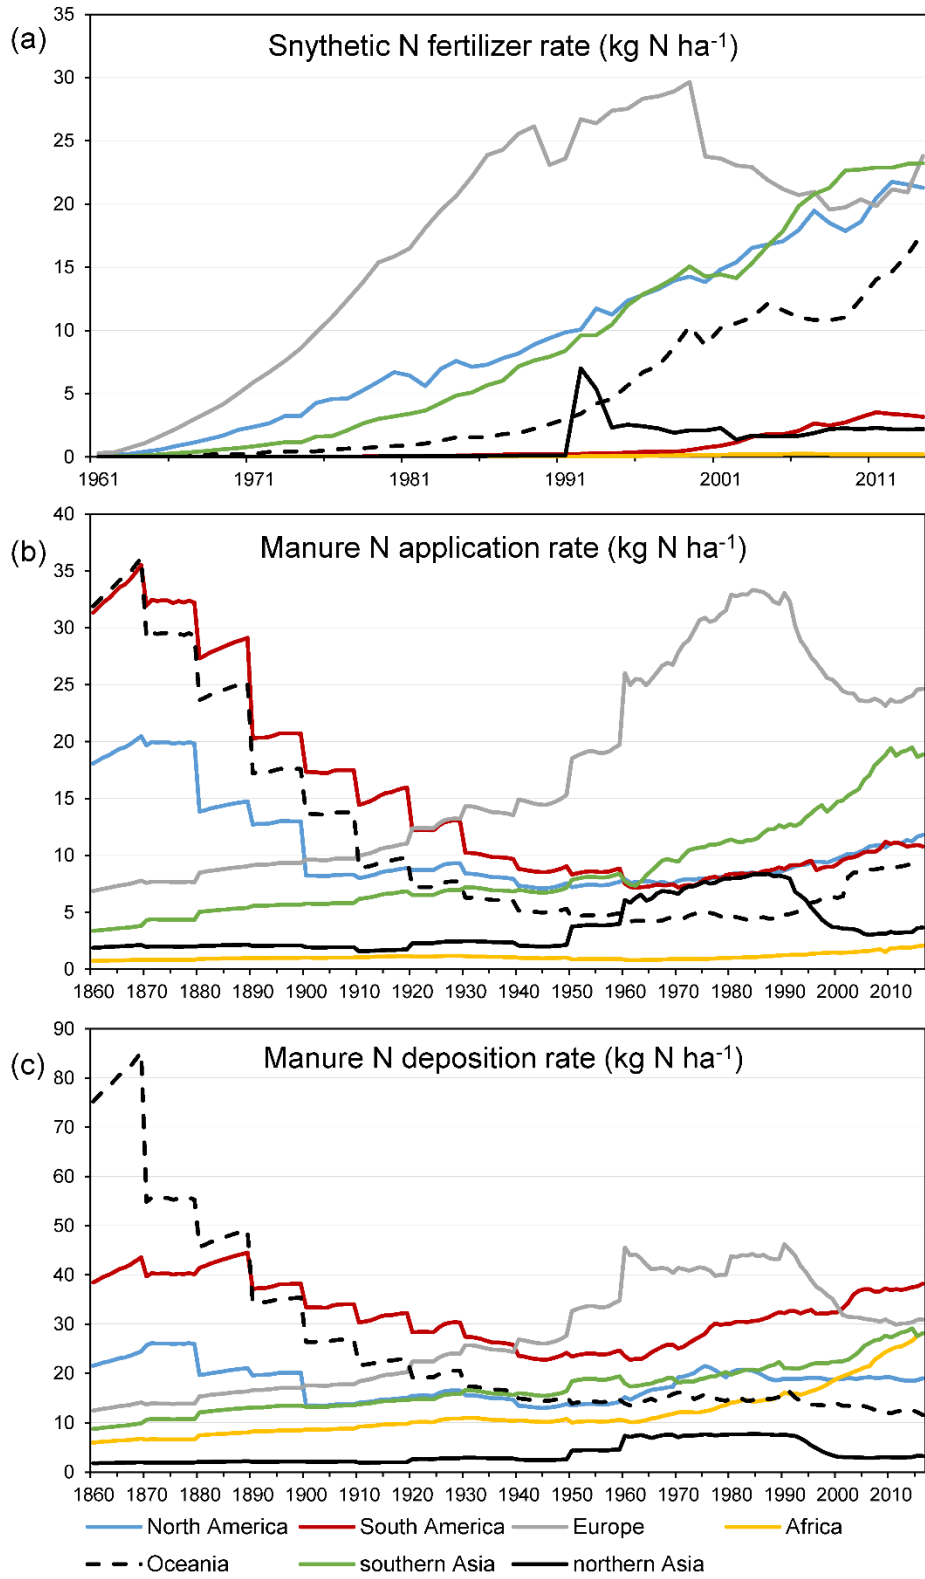

Figure S3. The temporal patterns of average N input rates (kg N ha<sup>-1</sup>) in regional pastures and rangelands during 1860-2016.
